# Supplementary material
Source: publisher figshare collection journal article supplement (https://acs.figshare.com/ndownloader/files/25878527)
Supplement: Supplementary file 1 [file 25878527]

---

# Supporting Information

## Synergistic Effects of Ternary PdO-CeO<sub>2</sub>-OMS-2 Catalyst Afford High Catalytic Performance and Stability in the Reduction of NO with CO

Song Guo<sup>†, #</sup>, Guomei Zhang<sup>\*, #</sup>, Zhong-Kang Han<sup>Δ, #</sup>, Shaoyang Zhang<sup>†, ‡</sup>, Debalaya Sarker<sup>Δ</sup>, Wen Wu Xu<sup>δ, \*</sup>, Xiaoli Pan<sup>†</sup>, Gao Li<sup>†, \*</sup>, and Alfons Baiker<sup>\$, \*</sup>

<sup>†</sup>State Key Laboratory of Catalysis, Dalian Institute of Chemical Physics, Chinese Academy of Sciences, Dalian 116023, China

<sup>‡</sup>School of Chemistry and Chemical Engineering, Shanxi University, Taiyuan 030006, China

<sup>Δ</sup>Center for Energy Science and Technology, Skolkovo Institute of Science and Technology, Skolkovo Innovation Center, Moscow, 143026, Russia

<sup>δ</sup>Department of Physics, School of Physical Science and Technology, Ningbo University, Ningbo, 315211, China

<sup>\$</sup>Department of Chemistry and Applied Biosciences, Institute for Chemical and Bioengineering, ETH Zurich, Hönggerberg, HCI, CH-8093 Zurich, Switzerland

<sup>#</sup> S.G., Z.-K. H. and G.Z. contributed equally.

E-mail: gaoli@dicp.ac.cn (G.L.); xuwenwu@nbu.edu.cn (W.X.); alfons.baiker@chem.ethz.ch (A.B.)

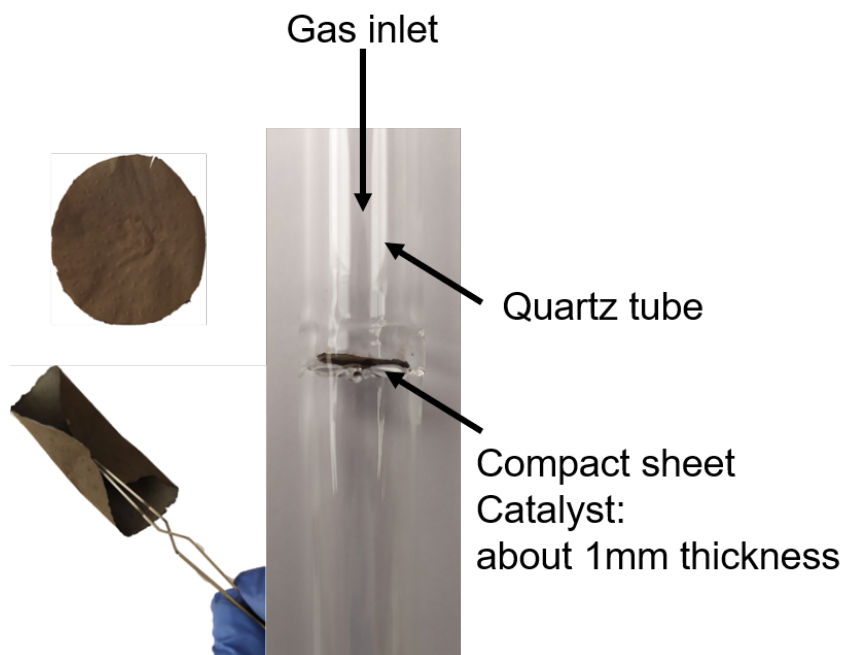

**Figure S1.** Flexible sheet of the PdO-CeO<sub>2</sub>-OMS-2 composite and its arrangement in the reactor tube. The catalyst is packed as a layer of ~1 mm thickness, which is comprised of several flexible sheets.

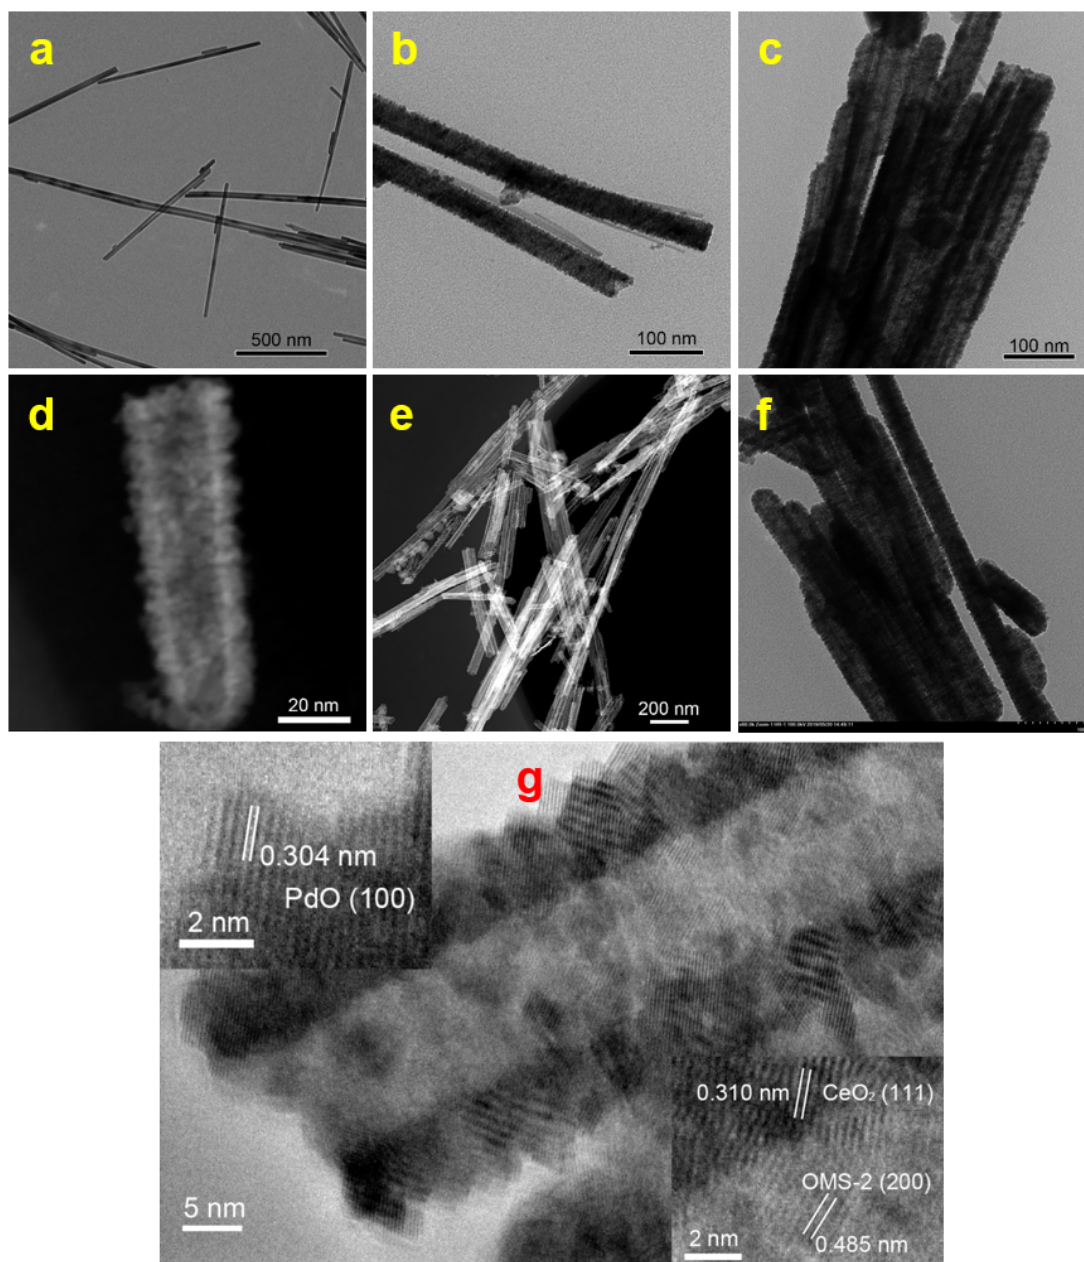

**Figure S2.** The representative bright field TEM images of (a) OMS-2, (b) CeO<sub>2</sub>-OMS and (c) PdO-CeO<sub>2</sub>-OMS samples. (d,e) STEM micrographs of PdO-CeO<sub>2</sub>-OMS sample. The nanowire-like OMS-2 show a length varying between 500 nm to 2  $\mu$ m and a width of  $\sim$ 20 nm. (f) The TEM image of the used PdO-CeO<sub>2</sub>-OMS catalyst. (g) The HRTEM image of PdO-CeO<sub>2</sub>-OMS sample.

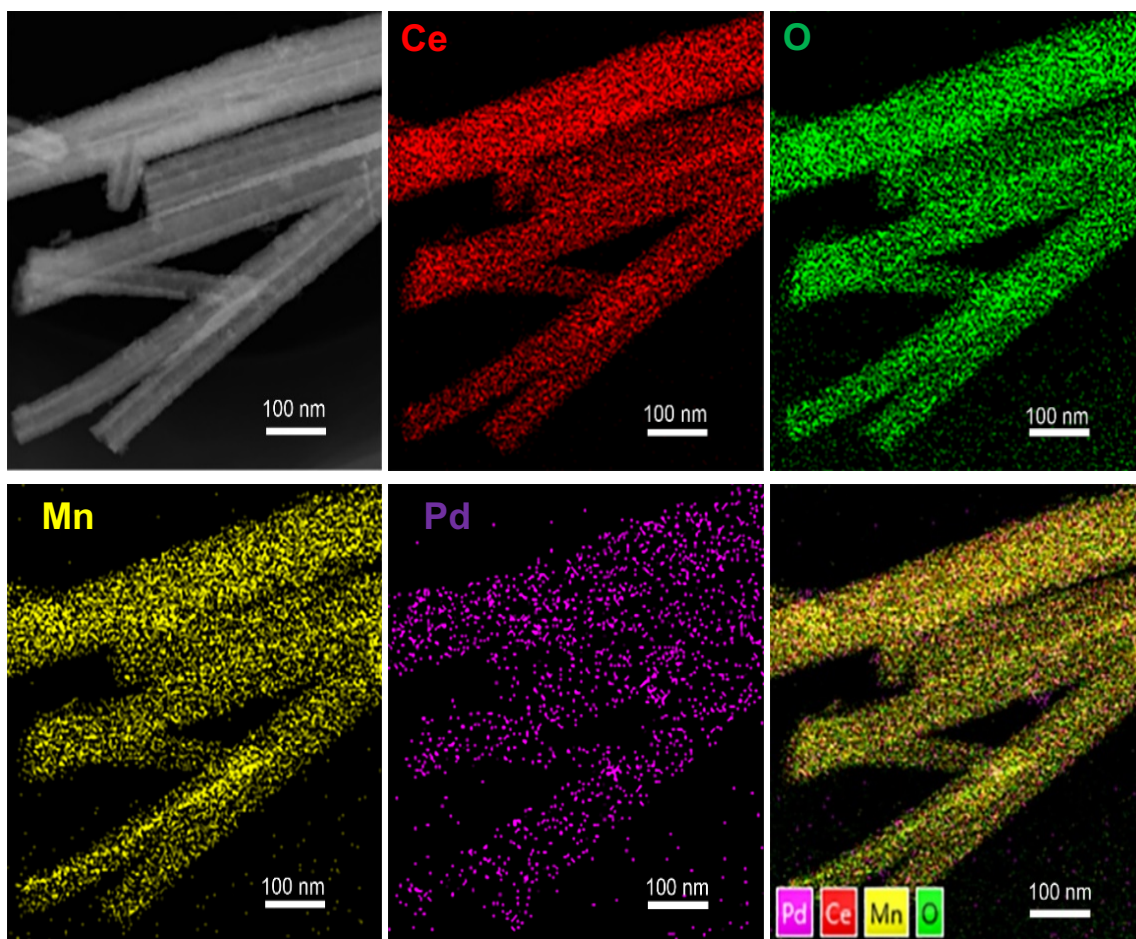

**Figure S3.** STEM micrograph and the corresponding Pd, Ce, Mn and O elemental mapping of PdO-CeO<sub>2</sub>-OMS sample.

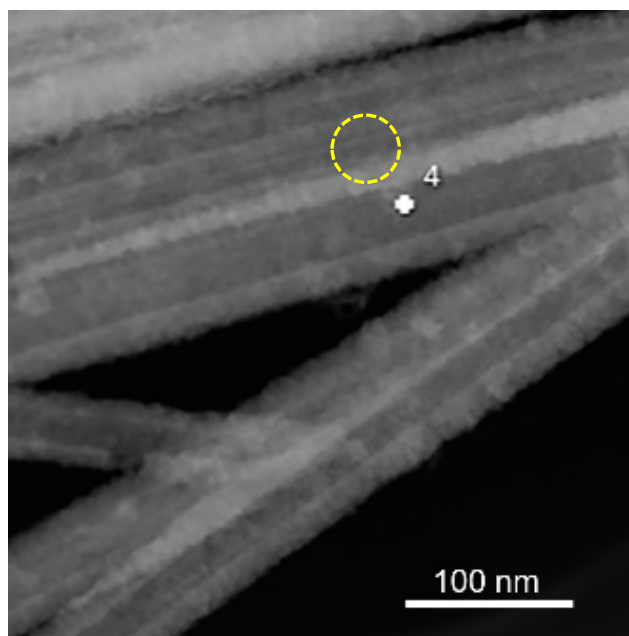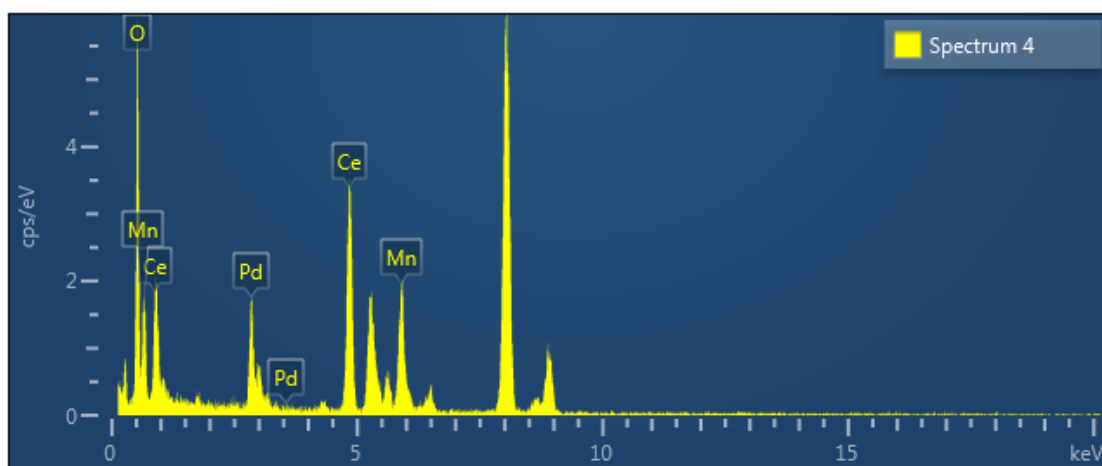

**Figure S4.** STEM of PdO-CeO<sub>2</sub>-OMS catalyst and EDX of area 4.

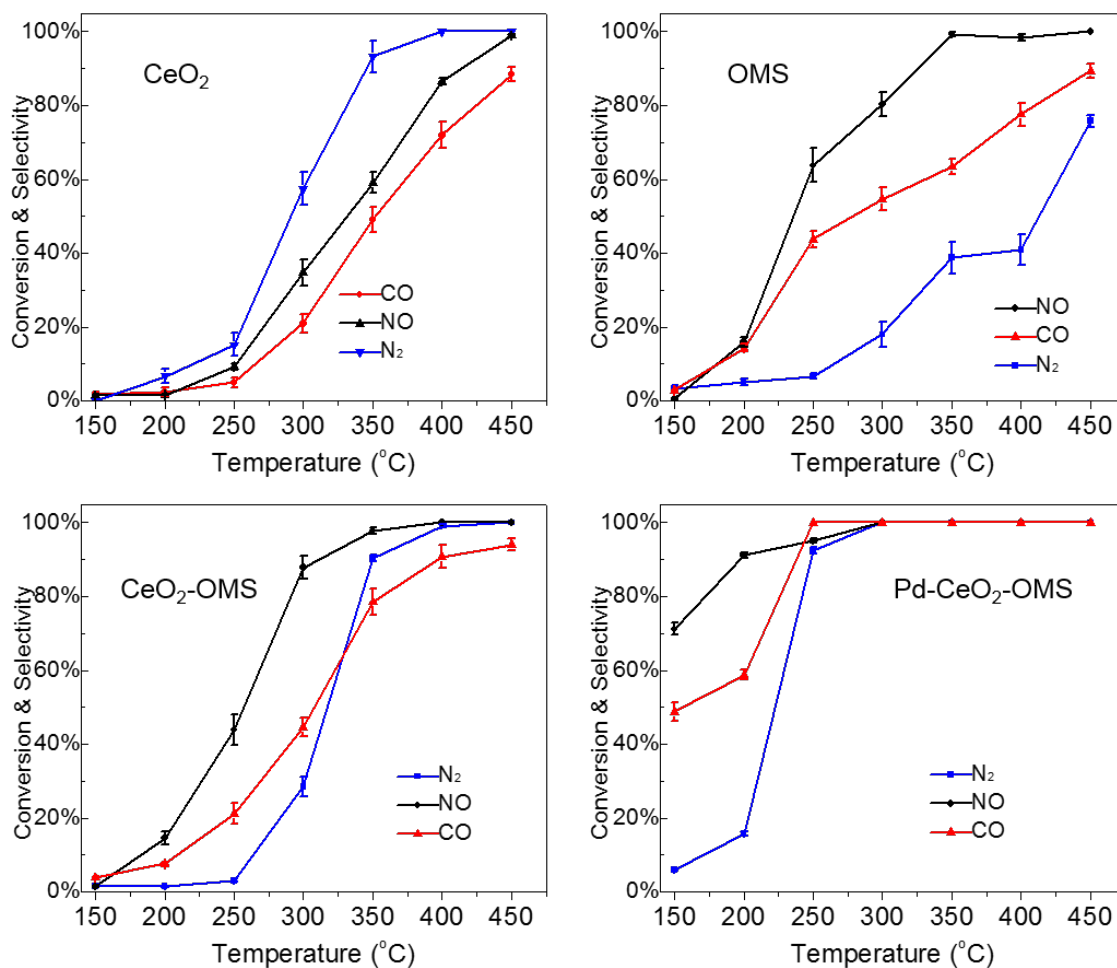

**Figure S5.** Conversion of CO and NO and selectivity to N<sub>2</sub> over the CeO<sub>2</sub>, OMS-2, CeO<sub>2</sub>-OMS, and PdO-CeO<sub>2</sub>-OMS catalysts. Note that the NO conversion is higher than corresponding CO conversion. Reaction conditions: 100 mg catalysts, GHSV = 30,000 h<sup>-1</sup>, 1 vol% NO and 1 vol% CO in argon balance.

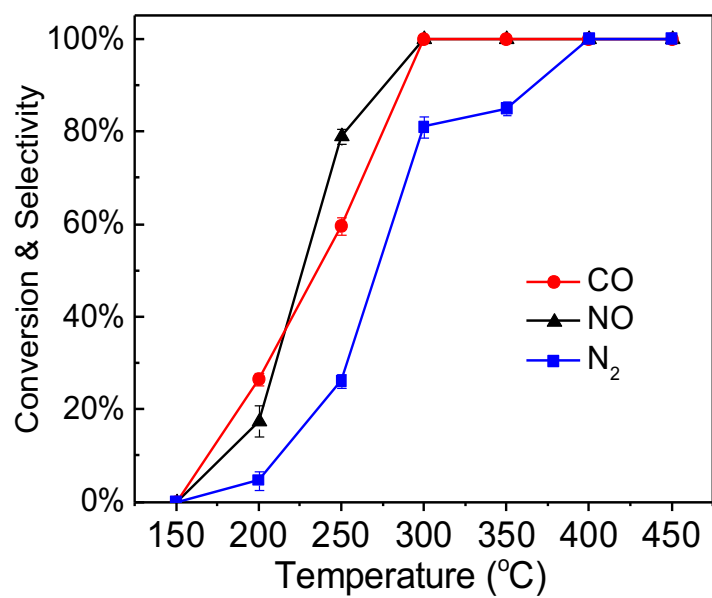

**Figure S6.** Catalytic performance of PdO-OMS-2 catalysts.

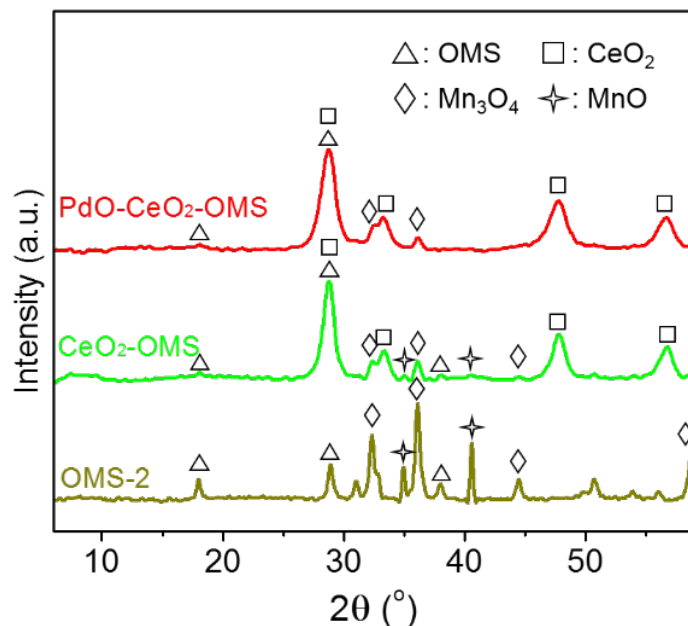

**Figure S7.** XRD patterns of used OMS-2, CeO<sub>2</sub>-OMS and PdO-CeO<sub>2</sub>-OMS-2 catalysts after the NO reduction tests.

XRD peaks of the OMS-2 are weakened after the NO-SCR reaction with CO (Figure S7) and two new diffraction peaks appeared at 36.0° and 40.6°, which belong to crystalline phase of Mn<sub>3</sub>O<sub>4</sub> (JCPDS 18-0803) and MnO (JCPDS 07-0230), respectively. It indicates that the oxidation state of manganese is reduced from high state to low state during the NO reduction when using the plain OMS-2 as catalyst. For the CeO<sub>2</sub>-OMS catalyst, only a very weak new diffraction peak appears at 36.0°, indicating that a minor part of OMS-2 composite was reduced to Mn<sub>3</sub>O<sub>4</sub> species after the NO-SCR reactions. Notably, no new diffraction peak is found in the PdO-CeO<sub>2</sub>-OMS after the NO reduction, unraveling that PdO largely impedes the reduction of OMS-2 during the NO reduction process and the catalyzed NO+CO reaction should therefore be associated with the PdO component.



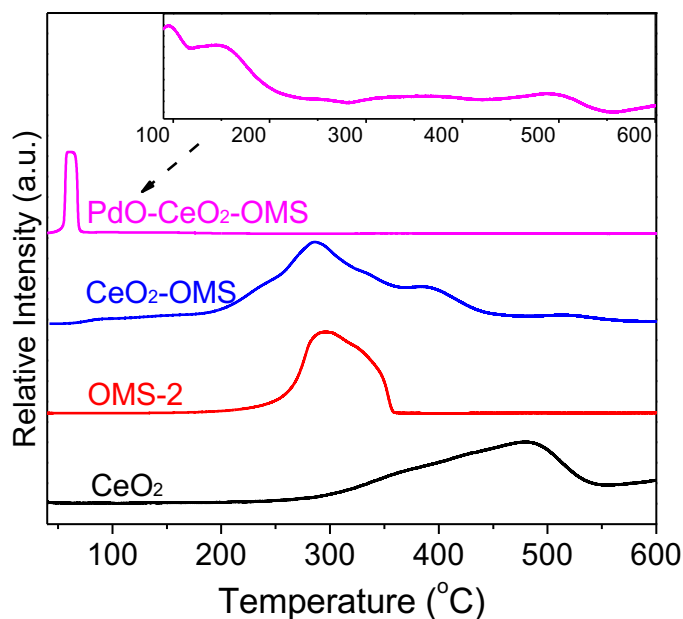

**Figure S8.** H<sub>2</sub>-TPR profiles of CeO<sub>2</sub>, OMS-2, CeO<sub>2</sub>-OMS-2, and PdO-CeO<sub>2</sub>-OMS-2. The inset shows the zoomed-in region beyond 100 °C for the PdO-CeO<sub>2</sub>-OMS-2 catalyst.

The redox properties of the catalysts are closely related to the activity in CO+NO reaction. Figure S8 displays the H<sub>2</sub>-TPR profiles of CeO<sub>2</sub>, OMS-2, CeO<sub>2</sub>-OMS components, and the PdO-CeO<sub>2</sub>-OMS catalysts. CeO<sub>2</sub> shows a broad reduction peak starting from 290 °C to 530 °C, representing the removal of surface oxygen of CeO<sub>2</sub>. OMS-2 gives rise to a strong peak around 300 °C with a shoulder around 325 °C, which is due to the reduction of MnO<sub>2</sub>/Mn<sub>2</sub>O<sub>3</sub> to Mn<sub>3</sub>O<sub>4</sub>/MnO. A series of peaks between 200 °C and 420 °C are observed for CeO<sub>2</sub>-OMS; the peaks ~300 °C and 400 °C correspond to the OMS-2 reduction and the reduction of surface Ce<sup>4+</sup> to Ce<sup>3+</sup>, respectively. It is worthy to note that the reduction process of OMS-2 is accompanied by the reduction of surface CeO<sub>2</sub> in the range of 330-420 °C, resulting in lower reduction temperature for surface CeO<sub>2</sub>. It suggests some interaction between ceria and MnO<sub>x</sub>. PdO-CeO<sub>2</sub>-OMS-2 shows a sharp reduction peak at 60 °C, which is attributed to reduction of the PdO species at interface to metallic Pd<sup>0</sup>. The other reductive peaks at 100 °C and 150 °C are assigned to the reduction of [O] on the surface of CeO<sub>2</sub>-OMS,<sup>1</sup> implying that PdO nanoparticles can promote hydrogen adsorption and electron transfer to the oxide surfaces thereby enhancing the catalytic performance in the NO reduction.<sup>2,3</sup>

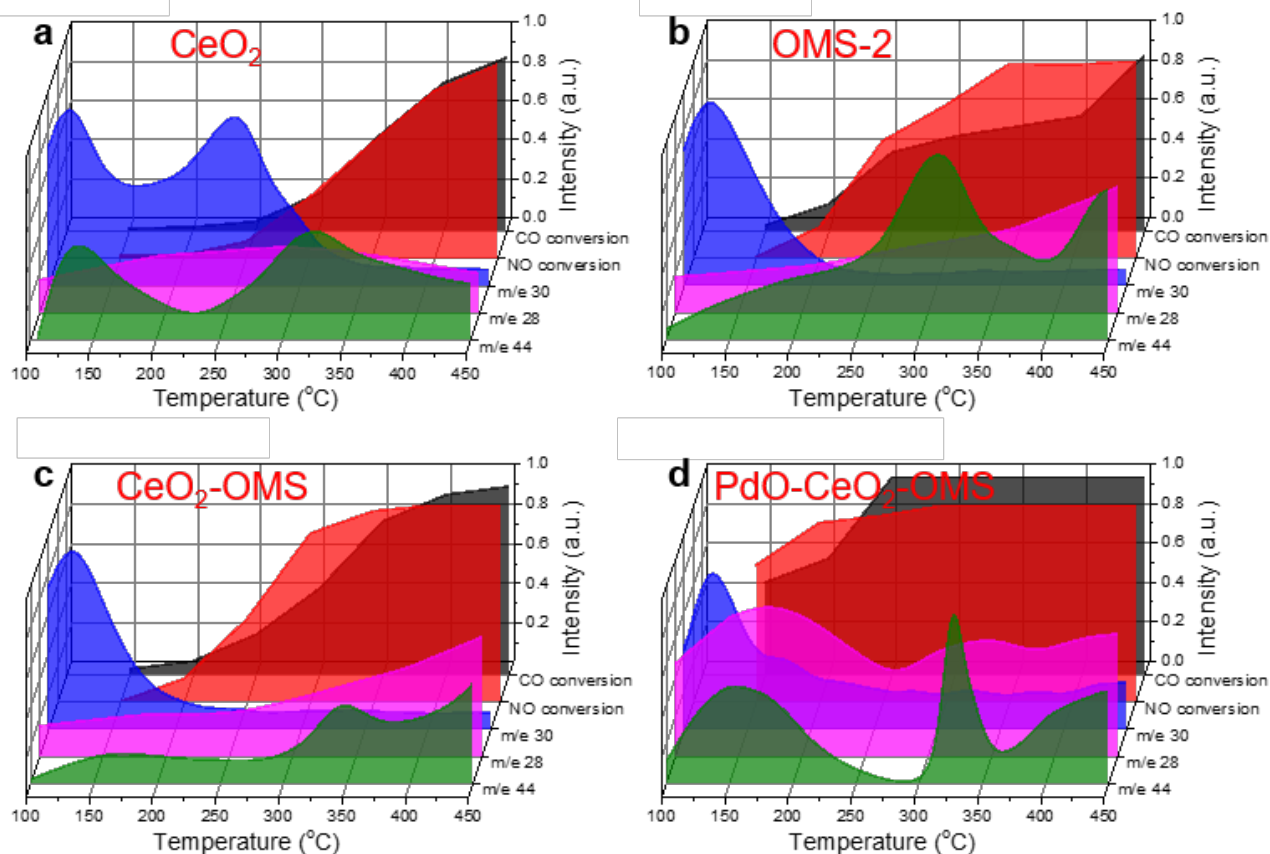

**Figure S9.** The normalized contrast profiles of (CO+NO)-TPD and conversion of CO and NO on (a) CeO<sub>2</sub>, (b) OMS-2, (c) CeO<sub>2</sub>-OMS-2 components, and (d) PdO-CeO<sub>2</sub>-OMS-2 catalyst.  $m/e = 28$ , 30 and 44 are assigned to signals of (CO or N<sub>2</sub>), NO and (CO<sub>2</sub> and N<sub>2</sub>O), respectively. The MS monitoring was supported by GC analyses.

In the CO+NO-TPD experiment, 50 mg catalyst was loaded into a U-shape quartz reactor and purged with N<sub>2</sub> at 300 °C for 2 h to remove adsorbed carbonates and hydrates. Then the system was cooled to room temperature and the N<sub>2</sub> flow of 10 mL min<sup>-1</sup> was switched to 1 vol% NO and 1 vol% CO (balance argon) mixed gas flow for 30 mins. After this exposure, the flow was changed to argon with same flowrate and the temperature was ramped from 100 °C to 450 °C at a rate of 10 °C/min. Desorbing gases were monitored by MS and GC analyses.

We correlated the relationship of the normalized (CO+NO)-TPD profiles and conversion curves of CO and NO. In the normalized (CO+NO)-TPD profiles, the signal peaks of  $m/e$  28, 30 and 44 represent CO and N<sub>2</sub>, desorption of NO, and N<sub>2</sub>O and CO<sub>2</sub> products, respectively. The NO

desorption occurred at  $\sim 115$  °C for OMS-2 and CeO<sub>2</sub>-OMS. While, for CeO<sub>2</sub> and PdO-CeO<sub>2</sub>-OMS it appeared at  $\sim 115$  °C and  $>200$  °C, which indicates that the NO molecules were strongly bound to the CeO<sub>2</sub> and PdO-CeO<sub>2</sub>-OMS. As concerns the signal of  $m/e$  28, CeO<sub>2</sub>, OMS-2, and CeO<sub>2</sub>-OMS showed no distinct peaks up to 300 °C, demonstrating that the adsorption of CO on these samples is relatively weak. For comparison, the PdO-CeO<sub>2</sub>-OMS sample showed a peak at 150 °C, unraveling that CO was selectively adsorbed and activated on the surface of the PdO particles. These results are in line with the XPS analyses of the used PdO-CeO<sub>2</sub>-OMS catalysts (Figure 5). Note that the peak of  $m/e$  28 at 150 °C here is assigned to CO, as confirmed by GC and also supported by the fact that the selectivity to N<sub>2</sub> is close to zero in the NO reduction at 150 °C (Figure 4c). The desorption trend of the mass peak  $m/e$  28 (the yield of N<sub>2</sub>O and CO<sub>2</sub>) is consistent with the observed conversion of CO and NO.

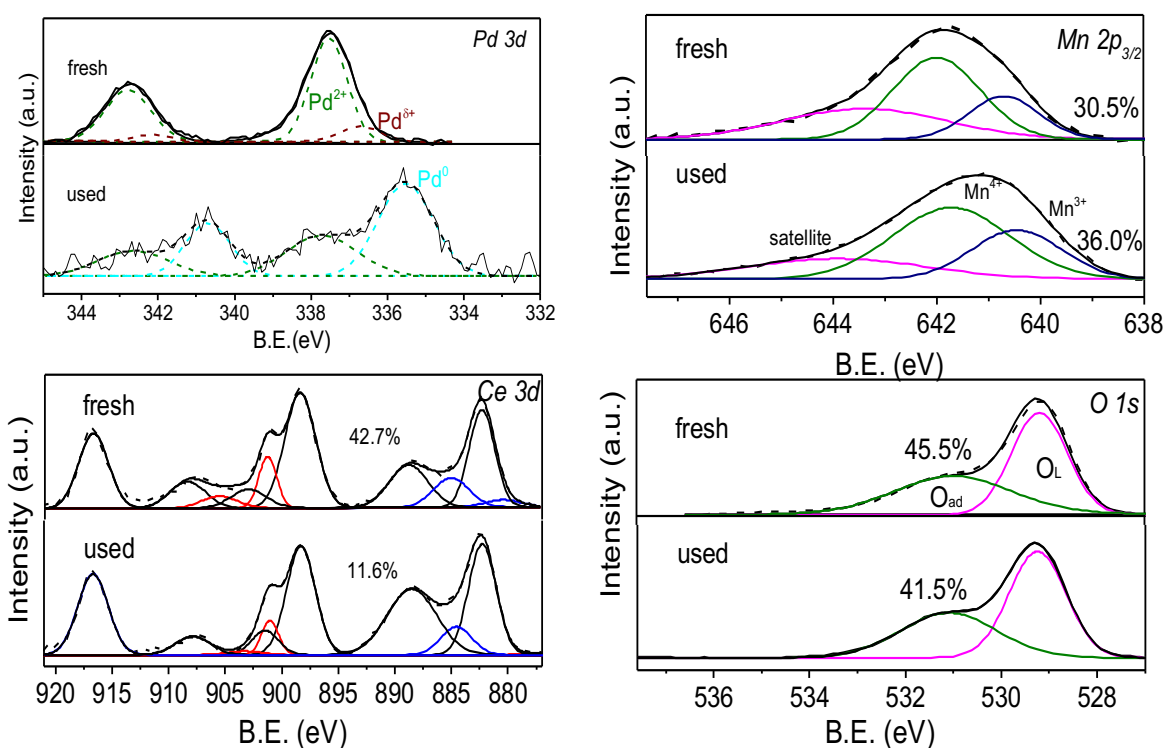

**Figure S10.** Pd 3d, Mn 2p<sub>3/2</sub>, Ce 3d and O 1s XPS spectra of fresh and used PdO-CeO<sub>2</sub>-OMS-2 catalyst. The red and blue peaks are the B.E. peaks of Ce<sup>3+</sup> species in Ce 3d.

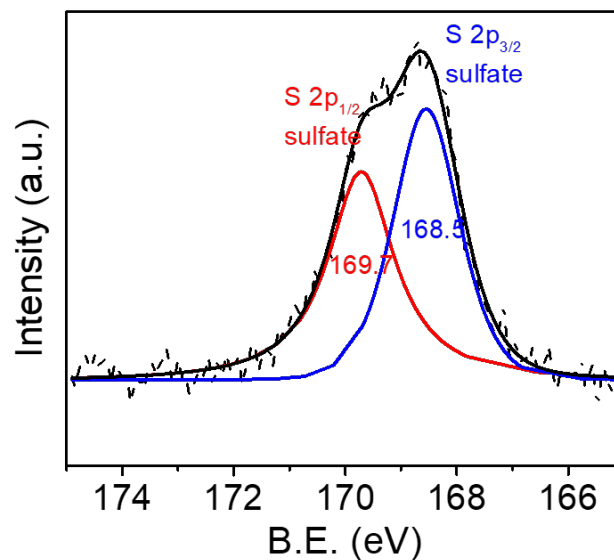

**Figure S11.** S2p XPS spectrum of the spent PdO-CeO<sub>2</sub>-OMS catalyst after experiments shown in Figure 6c with a feed containing 5% H<sub>2</sub>O and 100 ppm SO<sub>2</sub>.

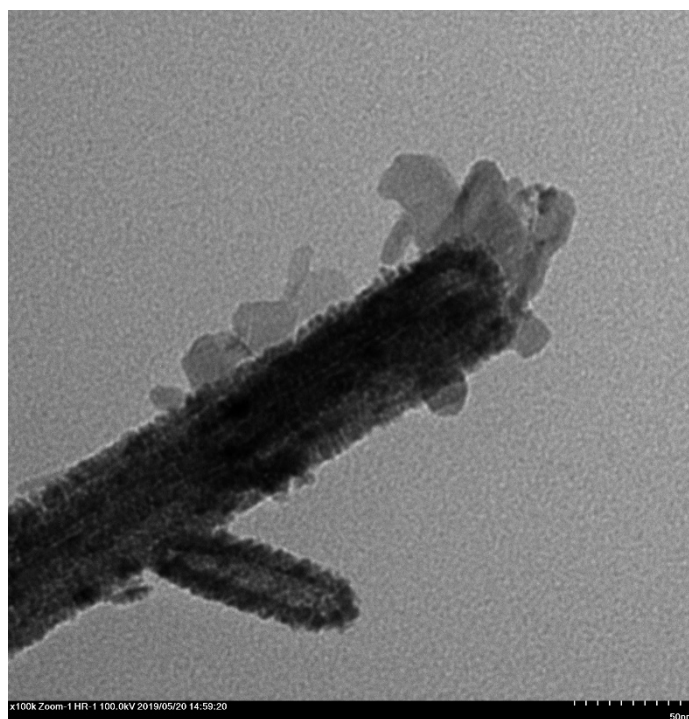

**Figure S12.** Typical TEM image of the spent PdO-CeO<sub>2</sub>-OMS-2 catalyst.

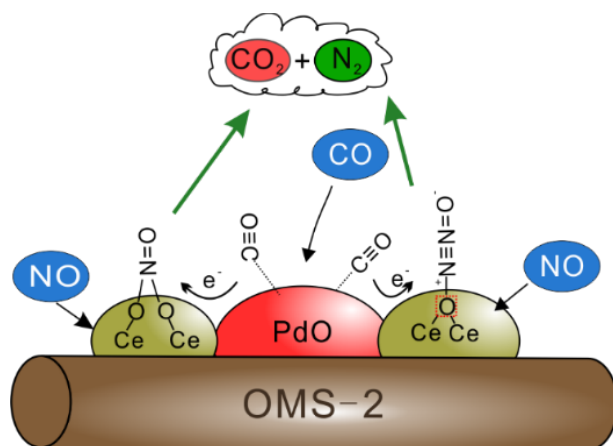

**Scheme S1.** Proposed mechanism for the reduction of NO with CO over the ternary PdO-CeO<sub>2</sub>-OMS-2 catalyst.

**Table S1.** Summary of XPS analysis of the fresh and spent catalysts. The values in the parentheses are assigned to the spent catalysts.

|      | species                                        | CeO <sub>2</sub> | OMS-2       | CeO <sub>2</sub> -OMS | PdO-OMS     | PdO-CeO <sub>2</sub> -OMS |
|------|------------------------------------------------|------------------|-------------|-----------------------|-------------|---------------------------|
| Mn2p | Mn <sup>3+</sup> /mol%                         |                  | 23.3 (41.4) | 31.0 (38.6)           | 30.9 (47.8) | 30.5 (36.0)               |
|      | Mn <sup>4+</sup> /mol%                         |                  | 76.7 (58.6) | 69.0 (61.4)           | 69.1 (52.2) | 69.5 (64.0)               |
|      | Mn <sup>4+</sup> /Mn <sup>3+</sup>             |                  | 3.3 (1.4)   | 2.2 (1.6)             | 2.2 (1.1)   | 2.3 (1.8)                 |
|      |                                                |                  |             |                       |             |                           |
| Ce3d | Ce <sup>3+</sup> /mol%                         | 42.3 (14.3)      |             | 36.2 (18.8)           |             | 42.7 (11.6)               |
|      | Ce <sup>4+</sup> /mol%                         | 57.7 (85.7)      |             | 63.8 (81.2)           |             | 57.3 (88.4)               |
|      | Ce <sup>4+</sup> /Ce <sup>3+</sup>             | 1.4 (6.0)        |             | 1.7 (4.3)             |             | 1.3 ( <b>7.6</b> )        |
|      |                                                |                  |             |                       |             |                           |
| O1s  | O <sub>latt</sub> /mol%                        | 36.4 (59.2)      | 78.1 (48.7) | 61.2 (57.0)           | 65.3 (61.4) | 54.5 (58.5)               |
|      | O <sub>ads</sub> /mol%                         | 25.3 (40.8)      | 21.9 (43.2) | 38.8 (43.0)           | 34.7 (38.6) | 45.5 (41.5)               |
|      | CO <sub>3</sub> <sup>2-</sup> /OH <sup>-</sup> | 38.3 (0)         | 0 (8.1)     | 0 (0)                 | 0 (0)       | 0 (0)                     |
|      | O <sub>ads</sub> /O <sub>latt</sub>            | 0.69 (0.69)      | 0.28 (0.88) | 0.63 (0.75)           | 0.53 (0.63) | 0.83 ( <b>0.71</b> )      |
|      |                                                |                  |             |                       |             |                           |
| Pd3d | Pd <sup>2+</sup> /mol%                         |                  |             |                       |             | 87.8 (38.5)               |
|      | Pd <sup>0</sup> /mol%                          |                  |             |                       |             | 12.2 (61.5)               |
|      | Pd <sup>2+</sup> /Pd <sup>0</sup>              |                  |             |                       |             | 7.2 ( <b>0.63</b> )       |

**Table S2.** Comparison of catalytic performances of representative catalysts for the reduction of NO with CO reported in the literature.

| Catalysts                                                                            | Component      | Catalyst usage (mg) | NO vol. (ppm) | Gas flow (h <sup>-1</sup> ) | 100% conv. T (°C) | Durability (h) | X <sub>NO</sub> & S <sub>N2</sub> (%) | Reagent (ppm)                    | Ref.      |
|--------------------------------------------------------------------------------------|----------------|---------------------|---------------|-----------------------------|-------------------|----------------|---------------------------------------|----------------------------------|-----------|
| NiO/CeO <sub>2</sub> (DP)                                                            | Ni, Ce         | 100                 | 2,500         | 120,000                     | 250               | -              | 100&100                               | CO: 2500                         | 4         |
| NiO/CuO                                                                              | Ni, Cu         | 125                 | 10,000        | 9600                        | 350               | -              | 100&90                                | CO: 10,000                       | 5         |
| Fe <sub>2</sub> O <sub>3</sub> /CeO <sub>2</sub>                                     | Fe, Ce         | -                   | 800           | 30,000                      | 200               | -              | 100&90                                | CO: 1600                         | 6         |
| Fe-Co catalyst                                                                       | Fe, Co         | 2,000               | 10,000        | 6000                        | 300               | -              | 100&100                               | CO: 20,000                       | 7         |
| Au@Fe <sub>2</sub> O <sub>3</sub> /CeO <sub>2</sub>                                  | Au, Fe, Ce     | 50                  | 3000          | 3000                        | 300               | -              | 95&98                                 | CO:3000;<br>H <sub>2</sub> :1000 | 8         |
| Ir-Au/Al <sub>2</sub> O <sub>3</sub>                                                 | Ir, Au, Al     | 200                 | 2000          | 6000                        | 350               | -              | 98&-                                  | CO: 2000                         | 9         |
| Fe-Zr catalyst                                                                       | Fe, Zr         | 1000                | 1000          | 90,000                      | 350               | -              | 100&100                               | CO: 7000                         | 10        |
| Mn <sub>3</sub> O <sub>4</sub> @C                                                    | Mn, C          | 218-872             | 600           | 60,000                      | 290               | 8              | 90&90                                 | NH <sub>3</sub> : 660            | 11        |
| Fe-V oxide                                                                           | Fe, V          | 25                  | 500           | 24,000                      | 300               | -              | 90&100                                | NH <sub>3</sub> :500             | 12        |
| VO <sub>x</sub> /CeO <sub>2</sub> @MnO <sub>x</sub>                                  | V, Ce, Mn      | 200                 | 500           | 160,000                     | 300               | -              | 95&100                                | NH <sub>3</sub> :500             | 13        |
| MnO <sub>x</sub> /Al <sub>2</sub> O <sub>3</sub>                                     | Mn, Al         | -                   | 500           | 35,000                      | 300               | -              | 95&100                                | NH <sub>3</sub> :500             | 14        |
| CeO <sub>2</sub> -TiO <sub>2</sub>                                                   | Ce, Ti         | -                   | 500           | 90,000                      | 300               | -              | 98&95                                 | NH <sub>3</sub> :500             | 15        |
| Au-Ce/Al-TiO <sub>x</sub>                                                            | Au, Ce, Al     | 600                 | 500           | 9,000                       | 300               | 16             | 100&100                               | CO:500                           | 16        |
| Ce <sub>x</sub> Sn <sub>1-x</sub> O <sub>2</sub>                                     | Ce, Sn         | 50                  | 50,000        | 600                         | 300               | -              | 45&90                                 | CO:100,000                       | 17        |
| CuO@ZrO <sub>2</sub> -TiO <sub>2</sub>                                               | Cu, Zr, Ti     | 50                  | 50,000        | 12,000                      | 300               | -              | 100&95                                | CO:100,000                       | 18        |
| CuO/Ce <sub>x</sub> Zr <sub>1-x</sub> O <sub>2</sub> /Al <sub>2</sub> O <sub>3</sub> | Cu, Ce, Zr, Al | 50                  | 50,000        | 12,000                      | 300               | -              | 100&100                               | CO: 100,000                      | 19        |
| Pt/WO <sub>3</sub> /CeO <sub>2</sub> /ZrO <sub>2</sub>                               | Pt, W, Ce, Zr  | 500                 | 5,000         | 40,000                      | 300               | -              | <20&-                                 | CO: 5,000                        | 20        |
| PdO-CeO <sub>2</sub> -OMS                                                            | Pd, Ce, Mn     | 100                 | 10,000        | 30,000                      | 300               | 150            | 100&100                               | CO:10,000                        | This work |

---

**Table S3.** Chemical elemental analysis of catalysts from ICP-OES analysis

| Catalyst                    | Pd content | Mn content | Ce content |
|-----------------------------|------------|------------|------------|
| PdO-CeO <sub>2</sub> -OMS-2 | 1.6 wt. %  | 15.6 wt. % | 51.1 wt. % |



---

## References

- (1) Zhang, X. Y.; Wei, J. J.; Yang, H. X.; Liu, X. F.; Liu, W.; Zhang, C.; Yang, Y. Z. One-Pot Synthesis of Mn-Doped CeO<sub>2</sub> Nanospheres for CO Oxidation. *Eur. J. Inorg. Chem.* **2013**, 2013 (25), 4443-4449.
- (2) Yao, X. J.; Tang, C. J.; Ji, Z. Y.; Dai, Y.; Cao, Y.; Gao, F.; Dong, L.; Chen, Y. Investigation of the Physicochemical Properties and Catalytic Activities of Ce<sub>0.67</sub>M<sub>0.33</sub>O<sub>2</sub> (M = Zr<sup>4+</sup>, Ti<sup>4+</sup>, Sn<sup>4+</sup>) Solid Solutions for NO Removal by CO. *Catal. Sci. Technol.* **2013**, 3 (3), 688-698.
- (3) Sun, C. Z.; Tang, Y. J.; Gao, F.; Sun, J. F.; Ma, K. L.; Tang, C. J.; Dong, L. Effects of Different Manganese Precursors as Promoters on Catalytic Performance of CuO–MnO<sub>x</sub>/TiO<sub>2</sub> Catalysts for NO Removal by CO. *Phys. Chem. Chem. Phys.* **2015**, 17 (24), 15996-16006.
- (4) Wang, Y.; Zhu, A.; Zhang, Y.; Au, C. T.; Yang, X.; Shi, C. Catalytic Reduction of NO by CO over NiO/CeO<sub>2</sub> Catalyst in Stoichiometric NO/CO and NO/CO/O<sub>2</sub> Reaction. *Appl. Catal. B Environ.* **2008**, 81 (1), 141-149.
- (5) Copper-Nickel Catalysts from Hydrotalcite Precursors: The Performance in NO Reduction by CO. *Appl. Catal. B Environ.* **2018**, 237, 327-338.
- (6) Cheng, X.; Zhang, X.; Su, D.; Wang, Z.; Chang, J.; Ma, C. NO Reduction by CO over Copper Catalyst Supported on Mixed CeO<sub>2</sub> and Fe<sub>2</sub>O<sub>3</sub>: Catalyst Design and Activity Test. *Appl. Catal. B: Environ.* **2018**, 239, 485-501.
- (7) Wang, L.; Cheng, X.; Wang, Z.; Ma, C.; Qin, Y. Investigation on Fe-Co Binary Metal Oxides Supported on Activated Semi-Coke for NO Reduction by CO. *Appl. Catal. B Environ.* **2017**, 201, 636-651.
- (8) Ilieva, L.; Pantaleo, G.; Velinov, N.; Tabakova, T.; Petrova, P.; Ivanov, I.; Avdeev, G.; Paneva, D.; Venezia, A. M. NO Reduction by CO over Gold Catalysts Supported on Fe-Loaded Ceria. *Appl. Catal. B Environ.* **2015**, 174-175, 176-184.
- (9) Song, Y.-J.; Jesús, Y. M. L.-D.; Fanson, P. T.; Williams, C. T. Kinetic Evaluation of Direct NO Decomposition and NO–CO Reaction over Dendrimer-Derived Bimetallic Ir–Au/Al<sub>2</sub>O<sub>3</sub> Catalysts. *Appl. Catal. B Environ.* **2014**, 154-155, 62-72.
- (10) France, L. J.; Li, W.; Zhang, Y.; Mu, W.; Chen, Z.; Shi, J.; Zeng, Q.; Li, X. A Superior Fe-Zr Mixed Oxide Catalyst for the Simultaneous Reduction of NO and SO<sub>2</sub> with CO. *Appl. Catal. B: Environ.* **2020**, 269, 118822.
- (11) Liu, Z.; Wang, M.; Liu, S.; Chen, Z.; Yang, L.; Sun, K.; Chen, Y.; Zeng, L.; Wang, W.; Zhao, J.; Sun, G.; Liu, B.; Pan, Y.; Liu, Y.; Liu, C. Design of Assembled Composite of Mn<sub>3</sub>O<sub>4</sub>@Graphitic Carbon Porous Nano-Dandelions: A Catalyst for Low-Temperature Selective Catalytic Reduction of NO<sub>x</sub> with Remarkable SO<sub>2</sub> Resistance. *Appl. Catal. B: Environ.* **2020**, 269, 118731.
- (12) Li, Y.; Liu, W.; Yan, R.; Liang, J.; Dong, T.; Mi, Y.; Wu, P.; Wang, Z.; Peng, H.; An, T. Hierarchical Three-Dimensionally Ordered Macroporous Fe-V Binary Metal Oxide Catalyst for Low Temperature

---

Selective Catalytic Reduction of NO<sub>x</sub> from Marine Diesel Engine Exhaust. *Appl. Catal. B: Environ.* **2020**, 268, 118455.

(13) Wu, X.; Yu, X.; Huang, Z.; Shen, H.; Jing, G. MnO<sub>x</sub>-Decorated VO<sub>x</sub>/CeO<sub>2</sub> Catalysts with Preferentially Exposed {110} Facets for Selective Catalytic Reduction of NO<sub>x</sub> by NH<sub>3</sub>. *Appl. Catal. B: Environ.* **2020**, 268, 118419.

(14) Yang, G.; Zhao, H.; Luo, X.; Shi, K.; Zhao, H.; Wang, W.; Chen, Q.; Fan, H.; Wu, T. Promotion Effect and Mechanism of the Addition of MO on the Enhanced Low Temperature Scr of NO<sub>x</sub> by NH<sub>3</sub> over MnO<sub>x</sub>/γ-Al<sub>2</sub>O<sub>3</sub> Catalysts. *Appl. Catal. B: Environ.* **2019**, 245, 743-752.

(15) Liu, H.; Fan, Z.; Sun, C.; Yu, S.; Feng, S.; Chen, W.; Chen, D.; Tang, C.; Gao, F.; Dong, L. Improved Activity and Significant SO<sub>2</sub> Tolerance of Samarium Modified CeO<sub>2</sub>-TiO<sub>2</sub> Catalyst for NO Selective Catalytic Reduction with NH<sub>3</sub>. *Appl. Catal. B Environ.* **2019**, 244, 671-683.

(16) Striking Activity Enhancement of Gold Supported on Al-Ti Mixed Oxide by Promotion with Ceria in the Reduction of NO with CO. *Appl. Catal. B: Environ.* **2017**, 209, 62-68.

(17) Yao, X.; Xiong, Y.; Zou, W.; Zhang, L.; Wu, S.; Dong, X.; Gao, F.; Deng, Y.; Tang, C.; Chen, Z.; Dong, L.; Chen, Y. Correlation between the Physicochemical Properties and Catalytic Performances of Ce<sub>x</sub>Sn<sub>1-x</sub>O<sub>2</sub> Mixed Oxides for NO Reduction by CO. *Appl. Catal. B: Environ.* **2014**, 144, 152-165.

(18) Sun, C.; Zhu, J.; Lv, Y.; Qi, L.; Liu, B.; Gao, F.; Sun, K.; Dong, L.; Chen, Y. Dispersion, Reduction and Catalytic Performance of CuO Supported on ZrO<sub>2</sub>-Doped TiO<sub>2</sub> for NO Removal by CO. *Appl. Catal. B: Environ.* **2011**, 103 (1), 206-220.

(19) Yu, Q.; Liu, L.; Dong, L.; Li, D.; Liu, B.; Gao, F.; Sun, K.; Dong, L.; Chen, Y. Effects of Ce/Zr Ratio on the Reducibility, Adsorption and Catalytic Activity of CuO/Ce<sub>x</sub>Zr<sub>1-x</sub>O<sub>2</sub>/γ-Al<sub>2</sub>O<sub>3</sub> Catalysts for NO Reduction by CO. *Appl. Catal. B: Environ.* **2010**, 96 (3), 350-360.

(20) Zhu, H.-o.; Kim, J.-R.; Ihm, S.-K. Characteristics of Pt/WO<sub>3</sub>/CeO<sub>2</sub>/ZrO<sub>2</sub> Catalysts for Catalytic Reduction of NO by CO. *Appl. Catal. B: Environ.* **2009**, 86 (1), 87-92.
